# Supplementary figures and images for: Three-Year Intervention Effects on Food and Beverage Intake—Results from the Quasi-Experimental Copenhagen School Child Intervention Study (CoSCIS)
Source: MDPI journal article supplement (doi:10.3390/ijerph181910543), 2021-10-08

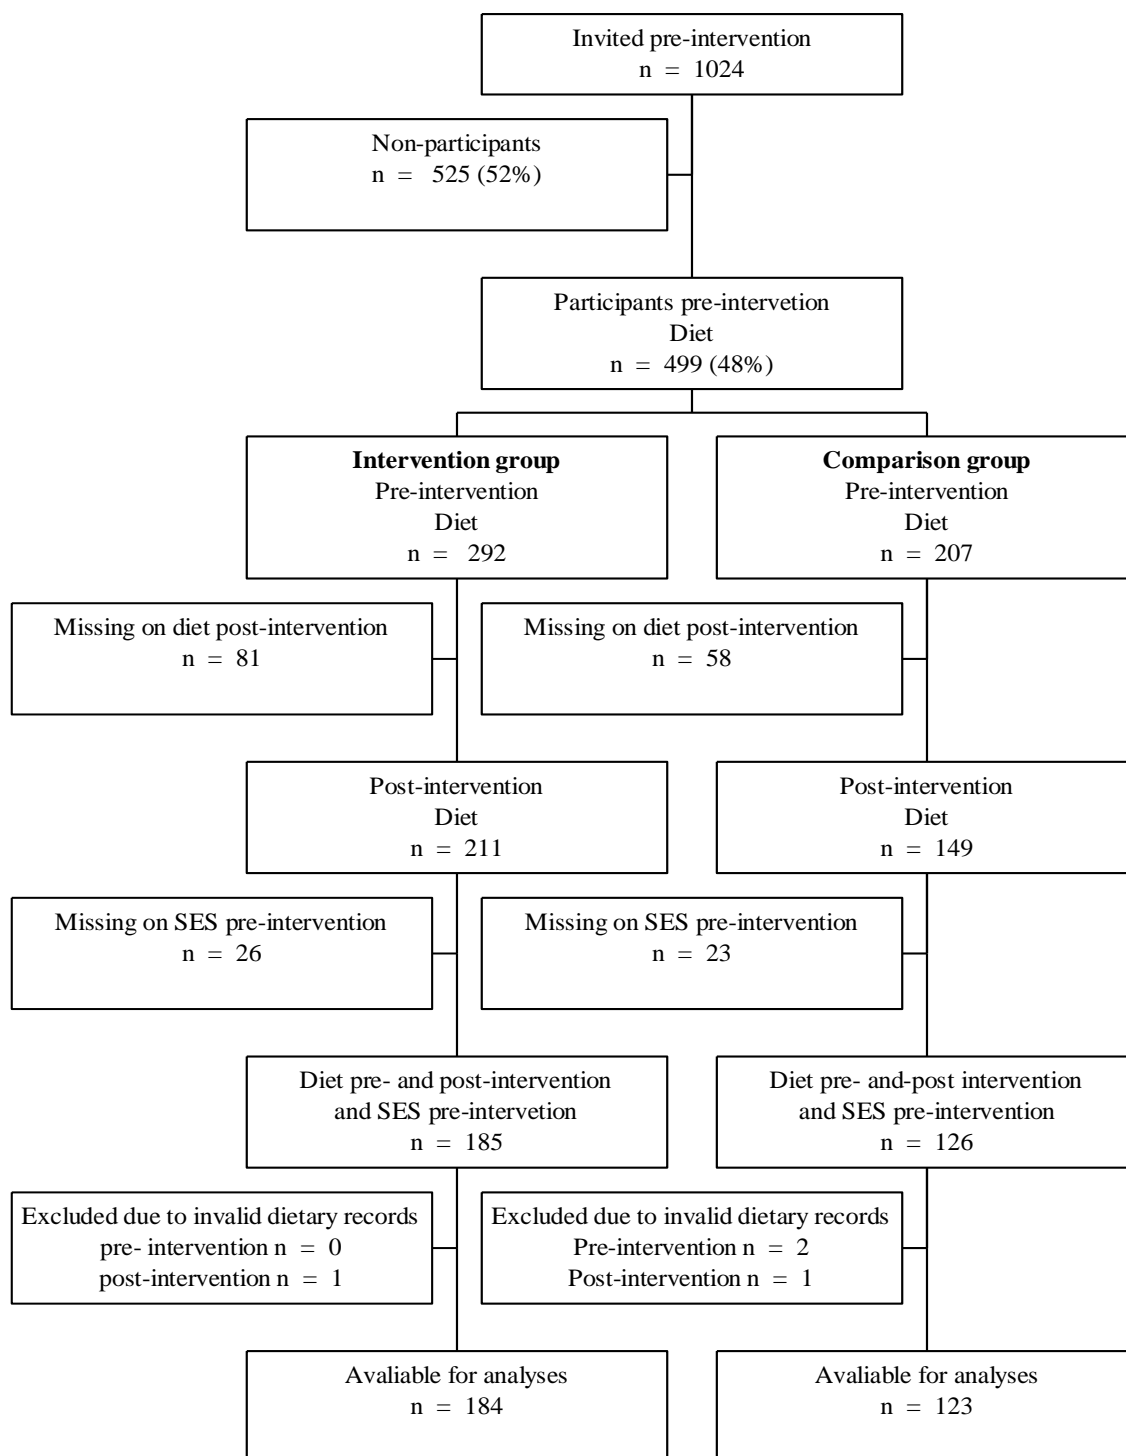

**Figure S1** Flow chart of the study population

Supplement: s1 [file s1]
